# Supplementary material for: Engagement of the private pharmaceutical sector for TB control: rhetoric or reality?
Source: PubMed Central journal article supplement (PMC5241918; doi:10.1186/s40545-016-0093-3), 2017-01-18
Supplement: 40545_2016_93_MOESM1_ESM.pdf [file 40545_2016_93_MOESM1_ESM.pdf]

Additional file 1: search terms used

| <b>PubMed Terms</b>                    | <b>Google Scholar Terms</b>   |
|----------------------------------------|-------------------------------|
| TB AND private AND seller*             | TB private seller             |
| Tuberculosis AND private AND seller*   | Tuberculosis private seller   |
| TB AND private AND retail*             | TB private retail             |
| Tuberculosis AND private AND retail*   | Tuberculosis private retail   |
| TB AND private AND chemist*            | TB private chemist            |
| Tuberculosis AND private AND chemist*  | Tuberculosis private chemist  |
| TB AND private AND pharmaci*           | TB private pharmacy           |
| Tuberculosis AND private AND pharmaci* | Tuberculosis private pharmacy |
| TB AND private AND vendor*             | TB private vendor             |
| Tuberculosis AND private AND vendor*   | Tuberculosis private vendor   |

The search was performed in the period November-December 2013.
