# Supplementary material for: Engagement of the private pharmaceutical sector for TB control: rhetoric or reality?
Source: PubMed Central journal article supplement (PMC5241918; doi:10.1186/s40545-016-0093-3), 2017-01-18
Supplement: 40545_2016_93_MOESM3_ESM.pdf [file 40545_2016_93_MOESM3_ESM.pdf]

Additional file 3: Data sources for figure 1 - comparison of retail drug outlets with corresponding TB burden and population size

|             | <b>% of private expenditure on health as Total Health Expenditure*</b> | <b>Incident TB cases**</b> | <b>Incidence per 100,000 people per year**</b> | <b>Estimated number of licensed and unlicensed retail drug outlets</b> | <b>Population<sup>#</sup></b> | <b>No. of people per outlet</b> | <b>Drug outlets per 100,000 people</b> |
|-------------|------------------------------------------------------------------------|----------------------------|------------------------------------------------|------------------------------------------------------------------------|-------------------------------|---------------------------------|----------------------------------------|
| Cambodia    | 79.5                                                                   | 390                        | 60,000                                         | 7,000 <sup>a</sup>                                                     | 15,578,000                    | 2,225                           | 44.94                                  |
| Afghanistan | 78.8                                                                   | 189                        | 60,000                                         | 10,131 <sup>b</sup>                                                    | 32,527,000                    | 3,211                           | 31.15                                  |
| Nigeria     | 76.1                                                                   | 322                        | 570,000                                        | 200,000 <sup>c</sup>                                                   | 182,202,000                   | 911                             | 109.77                                 |
| Myanmar     | 72.8                                                                   | 369                        | 200,000                                        | 8,000 <sup>d</sup>                                                     | 53,897,000                    | 6,737                           | 14.84                                  |
| Philippines | 68.4                                                                   | 288                        | 290,000                                        | 29,000 <sup>e</sup>                                                    | 100,699,000                   | 3,472                           | 28.80                                  |
| Bangladesh  | 64.7                                                                   | 227                        | 360,000                                        | 200,000 <sup>f</sup>                                                   | 160,996,000                   | 805                             | 124.23                                 |
| Tanzania    | 63.7                                                                   | 327                        | 170,000                                        | 9,626 <sup>g</sup>                                                     | 53,470,000                    | 5,555                           | 18.00                                  |
| Pakistan    | 63.2                                                                   | 270                        | 500,000                                        | 65,000 <sup>h</sup>                                                    | 188,925,000                   | 2,907                           | 34.41                                  |
| Indonesia   | 61                                                                     | 399                        | 1,000,000                                      | 30,643 <sup>i</sup>                                                    | 257,564,000                   | 8,405                           | 11.90                                  |
| Kenya       | 58.3                                                                   | 246                        | 110,000                                        | 8,200 <sup>j</sup>                                                     | 46,050,000                    | 5,616                           | 17.81                                  |
| Vietnam     | 58.1                                                                   | 140                        | 130,000                                        | 44,000 <sup>k</sup>                                                    | 91,714,000                    | 2,084                           | 47.98                                  |
| Uganda      | 55.6                                                                   | 161                        | 61,000                                         | 7,323 <sup>l</sup>                                                     | 39,032,000                    | 5,330                           | 18.76                                  |
| DR Congo    | 46.9                                                                   | 325                        | 240,000                                        | 3,791 <sup>m</sup>                                                     | 77,267,000                    | 20,382                          | 4.91                                   |

\* WHO. Global Health Observatory data repository. 2014. <http://apps.who.int/gho/data/node.main>

\*\* WHO Global TB Report, 2015

# World Bank, 2015

#### Data sources for estimated number of licensed and un-licensed retail drug outlets

Annex 1 of the 2012 International Pharmaceutical Federation (FIP) Global Pharmacy Workforce Report has data on total number of licensed pharmacies (<http://www.fip.org/humanresources>) that are based on country surveys. Because we were interested in both licensed and un-licensed retail drug outlets, we expanded our search for data sources because in many low-income and some middle-income countries, retail drug outlets are not adequately licensed or regulated. If data were not available from any other source, we relied on the FIP 2012 Global Pharmacy Workforce Report to determine the estimated number of licensed pharmacies only.

## Data sources for estimated number of licensed and unlicensed retail drug outlets

---

<sup>a</sup> Cambodia - The private commercial sector distribution chain for malaria treatment in Cambodia.

[http://www.actwatch.info/sites/default/files/content/publications/attachments/Cambodia\\_Report\\_SCRapid%2520assessment\\_2009.pdf](http://www.actwatch.info/sites/default/files/content/publications/attachments/Cambodia_Report_SCRapid%2520assessment_2009.pdf).

<sup>b</sup> Afghanistan – FIP 2012 Global Pharmacy Workforce Report.

<sup>c</sup> Nigeria - Beyeler N, Liu J, Sieverding M. A systematic review of the role of proprietary and patent medicine vendors in healthcare provision in Nigeria. PLoS One. 2015 Jan 28;10(1):e0117165. doi: 10.1371/journal.pone.0117165.

<sup>d</sup> Myanmar - Lulu.com Myanmar Medical and Pharmaceutical Industry Handbook - Strategic Information and Regulations. Available at

<https://books.google.com/books?isbn=1312884479>.

<sup>e</sup> Philippines - Management Sciences for Health staff based in the Philippines (for estimates of 29,000). A 2013 media article entitled “Public warned on ghost pharmacies” provided lower-end estimates of more than 20,000 drug stores (<http://newsinfo.inquirer.net/391941/public-warned-on-ghost-pharmacists>).

<sup>f</sup> Bangladesh - Management Sciences for Health staff based in Bangladesh. An upper estimate of 300,000 was also provided, but the team chose the average estimate of 200,000.

<sup>g</sup> Tanzania - Management Sciences for Health staff based in Tanzania. Data include both accredited and non-accredited drug dispensing outlets.

<sup>h</sup> Pakistan - Barriers and Opportunities to Effectively Engage Private Sector Retail Pharmacies as DOTS Centers in Pakistan.

<http://apps.who.int/medicinedocs/en/m/abstract/Js22356en/>

<sup>i</sup> Indonesia - National Health Profile. 2014. <http://www.depkes.go.id/resources/download/pusdatin/profil-kesehatan-indonesia/profil-kesehatan-indonesia-2014.pdf>.

<sup>j</sup> Kenya - Management Sciences for Health staff based in Kenya.

<sup>k</sup> Vietnam - FIP 2012 Global Pharmacy Workforce Report.

<sup>l</sup> Uganda - Management Sciences for Health staff based in Uganda.

<sup>m</sup> DR Congo - Management Sciences for Health staff based in DR Congo. The estimate of 3,791 retail drug outlets is from only 4 of 11 provinces.
